## Retraction

## Retraction of: LINC00265 targets miR-382-5p to regulate SAT1, VAV3 and angiogenesis in osteosarcoma

Ying Xiao<sup>1</sup>, Chunling Li<sup>1</sup>, Hongyue Wang<sup>2</sup>, Yijun Liu<sup>3</sup>

<sup>1</sup>Department of Operating Center, The First Hospital of Jilin University, Changchun 130000, Jilin, China

<sup>2</sup>Department of Nephrology, The First Hospital of Jilin University, Changchun 130000, Jilin, China

<sup>3</sup>Department of Orthopaedics, The First Hospital of Jilin University, Changchun 130000, Jilin, China

Correspondence to: Yijun Liu; email: [liyuj@jlu.edu.cn](mailto:liyuj@jlu.edu.cn)

Keywords: angiogenesis, vasculogenic mimicry, LINC00265, miR-382-5p, spermidine/spermine N1-acetyltransferase-1

Original article: *Aging (Albany NY)* 2020; 12: pp 20212–20225

PMID: [33109774](https://pubmed.ncbi.nlm.nih.gov/33109774/)

PMCID: [PMC7655165](https://pubmed.ncbi.nlm.nih.gov/PMC7655165/)

doi: [10.18632/aging.103762](https://doi.org/10.18632/aging.103762)

**This article has been retracted:** Aging has completed its investigation of this paper. Several concerns were raised about the paper, including internal duplications and overlap with unrelated papers from different institutions. We found that three IHC panels from **Figure 2N** (human tumor specimens) were reproduced in **Figure 8H** (mice tumor specimens), while a panel in **Figure 5F** duplicates **Figure 6F**. In addition, images of GAPDH western blots from **Figures 5C, 7E and 8E**, illustrating different experiments, are identical and were also found in unrelated papers published earlier [1, 2, 3]. Article [3] also shares a transwell assay image with a panel in **Figure 5G** and transwell assay images from **Figures 5G, 6G and 7J** are present in an earlier paper [4]. Western blot images in **Figures 5C and 6C** show bands duplicating those from an earlier unrelated article [5], and the blot in **Figure 8F** was found in Figure 5E of another earlier article [6]. Finally, the plate images of colony formation experiments in **Figures 5E, 6E and 7J** were found in multiple earlier publications [7–11], some of which have already been retracted. The Scientific Integrity office at Aging contacted the authors multiple times, but the authors did not respond to requests to clarify. The corresponding author recently stated that “our work has serious problems that need to be addressed,” but the Scientific Integrity office did not receive an official retraction letter with the signatures of all authors. In light of all these facts the Editorial decision was made to retract this paper. The Scientific Integrity office also notified the authors’ Institutions about this retraction and added their names to an Editorial Warning list.

### REFERENCES

1. Li S, Sun W, Zheng H, Tian F. MicroRNA-145 accelerates the inflammatory reaction through activation of NF- $\kappa$ B signaling in atherosclerosis cells and mice. *Biomed Pharmacother.* 2018; 103:851–7. <https://doi.org/10.1016/j.biopha.2018.03.173>  
PMID: [29710501](https://pubmed.ncbi.nlm.nih.gov/29710501/)
2. Wang J, Wang Z, Yuan J, Wang J, Shen X. The positive feedback between ACSL4 expression and O-GlcNAcylation contributes to the growth and survival of hepatocellular carcinoma. *Aging (Albany NY).* 2020; 12:7786–800. <https://doi.org/10.18632/aging.103092>  
PMID: [32357142](https://pubmed.ncbi.nlm.nih.gov/32357142/)
3. Chen Y, Zhang W, Kadier A, Zhang H, Yao X. MicroRNA-769-5p suppresses cell growth and migration via targeting NUSAP1 in bladder cancer. *J Clin Lab Anal.* 2020; 34:e23193.

- <https://doi.org/10.1002/jcla.23193>  
PMID:31901150  
Retraction in: J Clin Lab Anal. 2023; 37:e24893. <https://doi.org/10.1002/jcla.24893>  
PMID:37183304
4. Yang J, Yu L, Yan J, Xiao Y, Li W, Xiao J, Lei J, Xiang D, Zhang S, Yu X. Circular RNA DGKB Promotes the Progression of Neuroblastoma by Targeting miR-873/GLI1 Axis. *Front Oncol.* 2020; 10:1104.  
<https://doi.org/10.3389/fonc.2020.01104>  
PMID:32793474
5. Liu J, Han H, Lu W, Fan G. 17 $\beta$ -estradiol binding to ER $\alpha$  promotes the progression of prolactinoma through estrogen-response element-induced CaBP-9k up-regulation. *Biosci Rep.* 2020; 40:BSR20191330.  
<https://doi.org/10.1042/BSR20191330>  
PMID:31894842  
Retraction in: *Biosci Rep.* 2022; 42:BSR-2019-1330\_RET. [https://doi.org/10.1042/BSR-2019-1330\\_RET](https://doi.org/10.1042/BSR-2019-1330_RET)  
PMID:36484796
6. Fu D, Lu C, Qu X, Li P, Chen K, Shan L, Zhu X. LncRNA TTN-AS1 regulates osteosarcoma cell apoptosis and drug resistance via the miR-134-5p/MBTD1 axis. *Aging (Albany NY).* 2019; 11:8374–85.  
<https://doi.org/10.18632/aging.102325>  
PMID:31600142
7. Sun L, Jiang C, Xu C, Xue H, Zhou H, Gu L, Liu Y, Xu Q. Down-regulation of long non-coding RNA RP11-708H21.4 is associated with poor prognosis for colorectal cancer and promotes tumorigenesis through regulating AKT/mTOR pathway. *Oncotarget.* 2017; 8:27929–42.  
<https://doi.org/10.18632/oncotarget.15846>  
PMID:28427191
8. Hu XM, Xiang JJ, Xiao BL, Huang YF, Xie JP. Wogonoside promotes apoptosis in gastric cancer AGS and SGC-7901 cells through induction of mitochondrial dysfunction and endoplasmic reticulum stress. *FEBS Open Bio.* 2019; 9:1469–76.  
<https://doi.org/10.1002/2211-5463.12693>  
PMID:31250981  
Retraction in: *FEBS Open Bio.* 2023; 13:796. <https://doi.org/10.1002/2211-5463.13584>  
PMID:38517364
9. Li Y, Tao C, Dai L, Cui C, Chen C, Wu H, Wei Q, Zhou X. MicroRNA-625 inhibits cell invasion and epithelial-mesenchymal transition by targeting SOX4 in laryngeal squamous cell carcinoma. *Biosci Rep.* 2019; 39:BSR20181882.  
<https://doi.org/10.1042/BSR20181882>  
PMID:30563928  
Retraction in: *Biosci Rep.* 2023; 43:BSR-2018-1882\_RET. [https://doi.org/10.1042/BSR-2018-1882\\_RET](https://doi.org/10.1042/BSR-2018-1882_RET)  
PMID:36714958
10. Zhao Y, Wang Y, Wang Y. Up-regulated *miR-500a* enhances hepatocarcinoma metastasis by repressing PTEN expression. *Biosci Rep.* 2017; 37:BSR20170837.  
<https://doi.org/10.1042/BSR20170837>  
PMID:29175997  
Retraction in: *Biosci Rep.* 2023; 43:BSR-2017-0837\_RET. [https://doi.org/10.1042/BSR-2017-0837\\_RET](https://doi.org/10.1042/BSR-2017-0837_RET)  
PMID:37083008
11. He B, Chen J, Liu L, Wang H, Wang S, Li P, Zhou J. Knockdown of Tcf3 enhances the wound healing effect of bone marrow mesenchymal stem cells in rats. *Biosci Rep.* 2019; 39:BSR20180369.  
<https://doi.org/10.1042/BSR20180369>  
PMID:31085716  
Retraction in: *Biosci Rep.* 2023; 43:BSR-2018-0369\_RET. [https://doi.org/10.1042/BSR-2018-0369\\_RET](https://doi.org/10.1042/BSR-2018-0369_RET)  
PMID:37021732
